# 1 **A Physiological Characterization in Controlled Bioreactors Reveals a Novel Survival** 2 **Strategy for *Debaryomyces hansenii* at High Salinity and Confirms its Halophilic Behavior.**

3 Clara Navarrete<sup>1</sup>, August T. Frost<sup>1</sup>, Laura Ramos-Moreno<sup>2</sup> and José L. Martínez<sup>1\*</sup>

4 <sup>1</sup>Technical University of Denmark, Department of Biotechnology and Biomedicine, Søtofts  
5 Plads Building 223, 2800 Kgs. Lyngby, Denmark

6 <sup>2</sup>University of Córdoba, Department of Microbiology, Campus de Rabanales, Edificio Severo  
7 Ochoa, 14071 Córdoba, Spain

8 \*Corresponding author: Section of Synthetic Biology (DTU Bioengineering), Department of  
9 Biotechnology and Biomedicine, Technical University of Denmark, Søtofts Plads Building 223,  
10 2800 Kgs. Lyngby, Denmark. Tel: +45 45 25 26 30; E-mail: [jlmr@dtu.dk](mailto:jlmr@dtu.dk)

11 **Keywords:** *Debaryomyces hansenii*, non-conventional yeast, osmotic stress, salt tolerance, batch  
12 fermentation, bioreactors

13

## 14 **Abstract**

15 *Debaryomyces hansenii* is traditionally described as a halotolerant non-conventional yeast, being  
16 the model organism for the study of osmo- and salt tolerance mechanisms in eukaryotic systems  
17 for the past 30 years.

18 However, unraveling of *D. hansenii*'s biotechnological potential has always been difficult due to  
19 the persistent limitations in the availability of efficient molecular tools described for this yeast.  
20 Additionally, there is a lack of consensus and contradictory information along the recent years  
21 that limits a comprehensive understanding of its central carbon metabolism, mainly due to a lack  
22 of physiological studies in controlled and monitored environments. Moreover, there is  
23 controversy about the diversity in the culture conditions (media composition, temperature and  
24 pH among others) used by different groups, which makes it complicated when trying to get  
25 significant conclusions and behavioral patterns.

26 In this work, we present for the first time a complete physiological characterization of *D.*  
27 *hansenii* in batch cultivations, in highly instrumented and controlled lab-scale bioreactors. Our  
28 findings contribute to a more complete picture of the central carbon metabolism and the external  
29 pH influence on the yeast ability to tolerate high Na<sup>+</sup> and K<sup>+</sup> concentrations. Finally, the  
30 controversial halophilic/halotolerant character of this yeast is further clarified.

31

## 32 **Introduction**

33 *Debaryomyces hansenii* is described as a halophilic/halotolerant non-conventional yeast. It is  
34 globally present in seawater and has been isolated from soil, air, materials of plant and animal  
35 origin as well as from polar waters and ice from Antarctic and Arctic glaciers (Norkrans 1966;  
36 Breuer and Harms 2006; Gunde-Cimerman *et al.* 2009). *D. hansenii* has been a model for the

37 study of osmo- and salt tolerance mechanisms in eukaryotic cells over the last 30 years (Adler *et*  
38 *al.* 1985; Prista *et al.* 1997, 2005). Potassium and sodium are crucial factors for yeast growth in  
39 high salt environments, and its halotolerant nature has been fully confirmed by the fact that the  
40 presence of sodium in the medium protects the yeast cells against oxidative stress and additional  
41 abiotic stresses like extreme pH or high temperature (Almagro *et al.* 2000; Papouškova and  
42 Sychrova 2007; Navarrete *et al.* 2009).

43 *D. hansenii*'s genome was completely sequenced in 2004 (Dujon *et al.* 2004), and although more  
44 than 6500 genes have been annotated since then, the molecular characterization of this yeast is  
45 still far from being fully known. The majority of these annotated genes are mainly associated  
46 with salt and osmotic stress tolerance mechanisms (Prista *et al.* 2016). Besides, it has been  
47 described that *D. hansenii* has the highest coding capacity among yeasts (79.2% of the genome)  
48 with 6906 detected coding sequences (CDS) and a gene redundancy of almost 50% (Gènolevures  
49 online database, [igenolevures.org/databases/](http://igenolevures.org/databases/)).

50 As mentioned before, potassium and sodium fluxes (and their accumulation in cell organelles)  
51 play a key role in ion homeostasis and halotolerance in *D. hansenii*. Genes for K<sup>+</sup> influx  
52 (*DhTRK1*, *DhHAK1*) were identified and studied at a molecular, transcriptional and protein level  
53 by different authors (Prista *et al.* 2007; Martinez *et al.* 2011). Two different plasma membrane  
54 cation efflux systems (*DhEna1/2*, *DhNha1*) have also been described (Almagro *et al.* 2001;  
55 Velkova and Sychrova 2006) as well as two intracellular Na<sup>+</sup>/H<sup>+</sup> antiporters (*DhKha1* and  
56 *DhNhx1*) (Garcia-Salcedo *et al.* 2007; Montiel and Ramos 2007). Very importantly, the role of  
57 glycerol production and accumulation in the osmotic stress response to high osmolarity was also  
58 fully established by Gustafsson and Norkrans in 1976, and further confirmed by Adler *et al.* in  
59 1985.

60 From a biotechnological point of view, *D. hansenii* is considered of great interest, due to its salt  
61 tolerant character (Gadanhó *et al.* 2003; Butinar *et al.* 2005; Prista *et al.* 2005; Ramos *et al.* 2017  
62 among others), especially in food industry where it is used in the ripening process of sausages by  
63 production of exopeptidases, development of flavor characteristics, and production of cheeses  
64 among others (Lopez Del Castillo-Lozano *et al.* 2007; Cano-Garcia *et al.* 2014). Moreover, *D.*  
65 *hansenii* is known to respire a broad range of carbon substrates and produce mycocins against  
66 other yeast species, like *Candida* (Banjara *et al.* 2016).

67 Nevertheless, only a few genes with high biotechnological relevance have been characterized so  
68 far in *D. hansenii*. It is the case of *DhJEN1*, coding for a monocarboxylic acid transporter (Casal  
69 *et al.* 2008), and genes coding for xylitol reductase, xylose dehydrogenase and xylose/H<sup>+</sup>  
70 transporter (Biswas *et al.* 2013; Ferreira *et al.* 2013), all of them used for the production of  
71 second-generation bioethanol in the fermentation of pentoses by *Saccharomyces cerevisiae*  
72 (Breuer and Harms 2006).

73 The difficulties when studying *D. hansenii*'s biotechnological potential have always been related  
74 to the limitations in the availability of highly efficient molecular tools described for this yeast  
75 (Prista *et al.* 2016). There is also a lack of information and full understanding of its carbon  
76 metabolism and physiological characterization during biotechnological processes.

77 On top of that, the large variation in culture conditions used (e.g. media composition,  
78 temperature, and pH) in previous studies impedes thorough understanding and solid conclusions  
79 on this peculiar yeast's behavior. To date, nobody has conducted an in-depth physiological  
80 analysis of this yeast in a controlled environment (e.g. using bioreactors), and there is a lack of  
81 consensus about its capacity to produce ethanol in high saline environments or its cell  
82 performance in the presence of high salt concentrations. While some studies point to a beneficial  
83 role of salts on *D. hansenii*'s performance (Almagro *et al.* 2000; Papouskova *et al.* 2007;  
84 Navarrete *et al.* 2009; Garcia-Neto *et al.* 2017), other claim that sodium is detrimental in terms  
85 for the fitness of this yeast in general (Capusoni *et al.* 2019; Sánchez *et al.* 2018). In addition, the  
86 osmo- and halotolerant terminology are often used wrongly, as there are some studies in which  
87 sodium is used for both purposes, despite there are reported evidences about sodium and  
88 potassium triggering a different effect. Potassium does not trigger a toxicity response, whereas  
89 sodium has been described to have detrimental effects on cell growth at lower concentrations  
90 than potassium, pointing to some authors to recently claim *D. hansenii* not being halophilic but  
91 just halotolerant (Sánchez *et al.* 2018), whilst several previous studies report *D. hansenii* as an  
92 halophilic yeast (Gonzalez-Hernandez *et al.* 2004; Chao *et al.* 2009; Martinez *et al.* 2011).

93 In relation to *D. hansenii*'s alcoholic fermentation capacity, the kinetics of cell inactivation in the  
94 presence of ethanol at 20%, 22.5% and 25% (v/v), have been measured by progressive sampling  
95 and viable counting, and used as an inference of the ethanol resistance status of different yeasts  
96 (Pina *et al.* 2004). *D. hansenii* PYCC 2968T (a.k.a. CBS 767, which we use in our present study)  
97 was found to be one of the most sensitive yeasts to ethanol in this study. Ethanol (or other  
98 polyols) production has been only reported when a mix of sugars or complex substrates are used  
99 as carbon source. For example, *D. hansenii* CCMI 941 was cultivated in xylose/galactose or  
100 xylose/glucose (Tavares *et al.* 2008) for production of xylitol, although only ethanol and glycerol  
101 were produced for a xylose/glucose ratio above 30%. Another strain background, *D. hansenii* B-  
102 2, was grown in semi-synthetic banana peel-yeast extract-peptone broth for ethanol production,  
103 where 40% (w/v) of glucose was fermented to 5.8% of ethanol (Brooks, 2008). In 2009,  
104 Calahorra *et al.* stated the activation of glucose fermentation by salts in *D. hansenii* Y7426. In  
105 this work, the authors incubated yeast cells in media containing 40mM of glucose, and  
106 afterwards they made a protein extraction and measured the ethanol production *in vitro*, by the  
107 enzyme extract. Only marginal ethanol production was reported though, within the range of  
108 micromoles per gram of glucose. However a most recent work performed by Garcia-Neto *et al.*  
109 in 2017, indicates otherwise: that the presence of high salts increases *D. hansenii*'s respiratory  
110 activity, in the same strain (Y7426). Overall, no ethanol production by *D. hansenii* has been  
111 shown during the growth process using glucose as a sole carbon source.

112 In this work, we present for the first time a complete physiological characterization of *D.*  
113 *hansenii* during batch cultivations in highly instrumented and controlled bioreactors. *D.*  
114 *hansenii*'s carbon metabolism and the external pH influence on the yeast capacity to tolerate high  
115 Na<sup>+</sup> and K<sup>+</sup> concentrations are also shown. Finally, its capability of ethanol production and the  
116 controversial halophilic/halotolerant character of this yeast is further discussed, and a novel  
117 survival strategy at high saline environments suggested.

118

## 119 **Materials and Methods**

### 120 **Strain and culture conditions**

121 The *Debaryomyces hansenii* strain CBS767 (PYCC2968; Prista *et al.* 1997; Navarrete *et al.*  
122 2009) was used in this study. Glycerol stocks containing sterile 30% glycerol (Sigma-Aldrich,  
123 Germany) were used to maintain the strain, and were preserved at -80°C.

124 Yeast extract Peptone Dextrose (YPD) medium plates with 2% agar, were used for growing the  
125 cells from the cryostocks at 28°C. For the pre-cultures of yeast cells, synthetic complete medium  
126 was used (6.7 g/L Yeast Nitrogen Base w/o amino acids, from Difco, plus 0.79 g/L complete  
127 supplement mixture, from Formedium). Separately sterilized 2% monohydrated glucose (VWR  
128 Chemicals, Germany) was added to the medium, and pH was adjusted to 6.0 with NaOH. All the  
129 solutions were autoclaved at 121°C for 20 min. Cells were incubated in 500 mL baffled  
130 Erlenmeyer shake flasks (culture volume 100 mL) at 28°C, 150 rpm for at least 24 hours.

131 For the growth curves in low glucose conditions, *D. hansenii* pre-cultures were prepared as  
132 specified in the above paragraph. From those pre-cultures, cells were grown in the same medium  
133 but with 0.2% of glucose, and with or without 1M/2M of NaCl or KCl, in order to get their  
134 growth profile. Initial OD<sub>600</sub> in the flask was 0.1 and samples were taken during eight days of  
135 cultivation at 28°C, 150 rpm.

### 136 **Bioreactor cultivations**

137 Batch cultivations were performed in biological replicates (between 2-7 per condition) in 1.0 L  
138 Biostat Qplus bioreactors (Sartorius Stedim Biotech, Germany). The temperature was controlled  
139 at 28°C and pH was maintained at 6.0 (when desired) by the automatic addition of 2M NaOH /  
140 2M H<sub>2</sub>SO<sub>4</sub>, and measured by pH sensors (Model EasyFerm Plus K8 160, Hamilton). The  
141 volumetric flow rate (aeration) was set at 1 vvm and the stirring was constant at 600 rpm.  
142 Dissolved oxygen concentration was also measured by DO sensors (Model OxyFerm FDA 160,  
143 Hamilton). The working volume in the vessel was 0.5 L, using exactly the same medium  
144 composition as in the pre-culture, containing either 2% or 0.2% of glucose when required. To  
145 study the effect of salt in *D. hansenii* cells, NaCl or KCl (PanReac Applichem, ITW Reagents)  
146 were added to the medium before autoclavation. The bioreactors were inoculated with 24 h  
147 inoculum from the pre-culture to get an initial OD<sub>600</sub> of 0.05-0.1. Samples for dry weight, optical  
148 density and HPLC were taken after the CO<sub>2</sub> percentage values reached 0.1 and until stationary  
149 phase.

### 150 **Metabolite analysis**

151 The concentrations of glucose, glycerol, acetate and ethanol were measured by High  
152 Performance Liquid Chromatography (Model 1100-1200 Series HPLC System, Agilent  
153 Technologies, Germany). The injection volume was 20 µl, the eluent 5mM H<sub>2</sub>SO<sub>4</sub> and the flow  
154 rate was set at 0.6 mL/h. The temperature of a Bio-Rad Aminex HPX-87H column was kept at  
155 60°C. A standard solution containing glucose (20 g/L), glycerol (2 g/L), acetate (2 g/L) and

156 ethanol (20 g/L) was used (Sigma-Aldrich, Germany) for exo-metabolites concentration  
157 determination.

### 158 **Off-gas and dissolved oxygen measurements**

159 CO<sub>2</sub> and O<sub>2</sub> concentrations were continuously analyzed in real time by mass spectrometry  
160 coupled to the off-gas line (model Prima PRO Process MS, Thermo Scientific, UK). From the  
161 off-gas CO<sub>2</sub> emission data, given in percentage, the maximum specific growth rate was  
162 calculated. Off-gas CO<sub>2</sub> and O<sub>2</sub> emission data were also used to determine the Carbon Dioxide  
163 Evolution Rate (CER), the Oxygen Uptake Rate (OUR) and the Respiratory Quotient (RQ).

164 Dissolved oxygen values were measured by DO sensors (Model OxyFerm FDA 160, Hamilton)  
165 as previously described in “Bioreactor cultivations” section.

### 166 **Analytical procedures**

167 Specific growth rates in the different growth conditions were calculated based on the optical  
168 density (OD<sub>600</sub>) and emitted CO<sub>2</sub> values.

169 Yield coefficients and carbon balances were used to describe the metabolite, by-products and  
170 biomass formation by the yeast cells, and were calculated based on the DW, accumulated CO<sub>2</sub>  
171 and HPLC data. The average minimal formula CH<sub>1.79</sub>O<sub>0.50</sub>N<sub>0.20</sub> for yeast dry cell biomass  
172 composition was used for the calculations as proposed by Roels in 1983. The specific glucose  
173 consumption rates were calculated based on the logarithmic method proposed in Görgens *et al.*  
174 in 2005.

### 175 **Statistical analysis**

176 Statistical analysis was performed with Microsoft Excel® 2016 (version 1903, 32-bit, USA). All  
177 values are represented as averages ± 95% confidence interval of independent biological replicate  
178 cultures. For regression analysis, the coefficient of determination (r<sup>2</sup>) was used to determine the  
179 statistical significance of the fit, where a value above 95% was considered statistically  
180 significant.

181

## 182 **Results**

### 183 ***D. hansenii* growth rate under the effect of high salt concentrations**

184 Specific growth rates were calculated based on the optical density and the volumetric CO<sub>2</sub>-  
185 production rates under the different growth conditions tested (Fig. 1). In general terms, a higher  
186 maximum specific growth rate was observed when a higher salt concentration is present in the  
187 media, except for concentrations of 2M of either salt, compared to control conditions. Sodium  
188 exhibit a significantly stronger positive impact than potassium, as the highest growth rate was  
189 reached in the presence of 1M NaCl (similar observations were made for KCl, where  
190 concentrations of 1M resulted in a higher growth rate compared to control, although lower than  
191 for NaCl). On the other hand, a decrease in specific growth rate is observed when the  
192 concentration of salts is above 1M, and up to 2M (Fig. 1, table). However, even at concentrations



193 of both sodium and potassium up to 1.5M, the growth rate values are still significantly higher  
194 than in control conditions (no salts added). Surprisingly, at 2M NaCl the growth rate is lower,  
195 but still very close to control conditions, although a prolonged lag phase is observed in  
196 comparison (exponential growth phase starts around 30-35 hours in the control vs. 40-45 hours  
197 for 2M NaCl, as inferred from the CO<sub>2</sub> profiles in Fig.1). In contrast, the addition of 2M KCl  
198 results in a lower  $\mu_{\max}$  compared to the 2M NaCl and also lower than the control, reinforcing the  
199 fact that NaCl still exerts some beneficial effect in *D. hansenii*'s cell performance overall.

200 The same conclusion can be inferred if we observe the carbon dioxide evolution rate (CER) of *D.*  
201 *hansenii* in the presence of salts over time (Fig. 1). The profiles show a higher CO<sub>2</sub> production  
202 (that can be translated into higher glucose consumption, hence a higher metabolic rate) when the  
203 cells grow in the presence of NaCl or KCl compared to control conditions with no salt. Once  
204 again, this effect begins to decrease when the salt concentrations are over 1.25M, nevertheless  
205 still higher than compared to the control conditions, except for 2M in which the production rate  
206 is lower than the control for both salts (Fig. 1).

### 207 **Biomass yield on substrate and biomass titers show a differential effect among K<sup>+</sup> and Na<sup>+</sup>**

208 The observed decrease in the specific growth rate from above 1M of salt seems to be  
209 compensated by a slightly higher biomass yield upon glucose, as was observed for the dry weight  
210 measurements during the cultivation time, although only for the addition of potassium (Table 1).  
211 The final biomass titers were not significantly different though, with the exception of the 2M  
212 sodium which were slightly higher in comparison (Suppl. Fig. S1).

213 When the specific glucose consumption rate was calculated, *D. hansenii* showed higher rates of  
214 consumption in the presence of NaCl or KCl than in control conditions, and again this effect  
215 started to revert once the concentration of salts used was above 1M up to 1.5M, although still  
216 higher values than those observed in the control (Table 1), while at 2M NaCl the specific  
217 consumption rates were lower than the control. The specific glucose consumption values  
218 observed were higher for sodium than for potassium at lower concentrations (1M – 1.25M), as  
219 seen before for the specific growth rate, however the opposite is observed at higher  
220 concentrations (uptake rates are higher in the presence of potassium).

221 To further investigate the effect of salts on the specific glucose uptake rates, *D. hansenii* was  
222 grown in low glucose conditions (0.2%), preliminarily in shake flasks and later by using  
223 bioreactors, to further confirm the findings in flasks. In the shake flask experiments, it was  
224 observed that cells growing in the presence of 1M KCl adapted much faster to the nutrient  
225 limitation and were able to grow at a significantly higher rate compared to the other conditions  
226 tested (Suppl. Fig. S2). This effect was also observed in the presence of 1M NaCl, but at a lower  
227 level. Moreover, the presence of 2M of either salt in the medium had no detrimental effect for  
228 the cells, which still grew at a similar growth rate compared to the control. Strikingly, the  
229 presence of 2M of NaCl resulted in almost 3 times higher biomass concentration than the control  
230 conditions. In this particular circumstance (high salts and low glucose), the effect of potassium  
231 seems to be beneficial in terms of growth rate, but sodium seems to have a better effect in cell  
232 performance in the long run, since the growth rate is slower but the final biomass concentration

233 is much higher in return (Suppl. Fig. S2). All together seem to confirm, without a doubt, the  
234 halophilic character of *D. hansenii* in one hand, and the differential effect of Na<sup>+</sup> and K<sup>+</sup> salts, in  
235 the other.

236 Based on these results in shake-flasks, and in order to obtain a more complete dataset that would  
237 support such observations, we then conducted the same type of batch cultures with a reduced  
238 initial glucose concentration (0.2%) in bioreactors without pH regulation (thus mimicking the  
239 previous flask conditions). Our previous observations in flasks cultivations were confirmed,  
240 however interesting differences were observed. The carbon dioxide evolution rates (CER) exhibit  
241 a much faster adaptation (Fig. 2A), evidenced by a shorter lag phase, when cells grow in the  
242 presence of 1M of either salt (NaCl or KCl), which confirms our observations in flasks. Further  
243 analyses showed significantly higher specific glucose uptake rates and, surprisingly, much higher  
244 growth rates at 1M of NaCl or KCl, than compared with the rest of the conditions (Fig. 2B). In  
245 contrast, CO<sub>2</sub> yields and biomass yields are higher at concentrations of 2M, being 2M NaCl the  
246 highest values of all conditions compared. Additional data showing the timeline of DW, OD<sub>600</sub>  
247 and glucose consumption, is shown in Suppl. Fig. S3.

248 As observed in the graph, the CER profiles are very similar between control conditions and cells  
249 growing at 2M KCl, only for 2M NaCl the CO<sub>2</sub> production peak seems lower (Fig. 2A), however  
250 when we look at the CO<sub>2</sub> yields on glucose, they are higher for both salts at 2M in comparison to  
251 1M and also with the control. The biomass yields at 2M are also higher than the 1M  
252 concentration, and much higher than the control, as shown in Figure 2B. Altogether, this  
253 confirms our observations in the shake flasks, pointing that on reduced glucose conditions, the  
254 positive effect of the presence of high salt concentration is even more acused. Moderate levels of  
255 salt (1 M) result in higher glucose consumption rates, and higher specific growth rates, while  
256 higher concentration of salts (2M) result in higher biomass yields and CO<sub>2</sub> yields, at the cost of a  
257 lower growth rate. A metabolim switch that can be described as: from growing as fast as possible  
258 to growing as much as possible. We also further confirmed that sodium exert a more positive  
259 impact than potassium, once again.

260 It is worth mentioning that the observed final OD values were higher for the control in bioreactor  
261 experiments than in shake flasks. Still we observed a higher biomass when cells are growing in  
262 2M NaCl, as we also saw in the shake flasks, however cell growth in control conditions was  
263 arrested at a lower OD in flasks compared to bioreactors, so the difference in total biomass is less  
264 significant for the latter (Suppl. Fig. S2). This is not surprising though, and simply illustrates the  
265 importance of using well stirred reactors in physiology studies.

### 266 **Dissolved oxygen concentration and RQ levels confirm a fully respiratory metabolism,** 267 **discarding a fermentative process in *D. hansenii* in our experimental conditions**

268 Dissolved oxygen levels during bioreactor cultivations were observed to decrease faster when  
269 Na<sup>+</sup> or K<sup>+</sup> is present in the medium, being those levels lower while the concentration of salt  
270 increases, suggesting a higher oxygen demand (Fig. 3). This confirms a higher metabolic activity  
271 at increasing salt concentrations, which again points to the halophilic character of *D. hansenii*,

272 and might already suggest a fully respiratory metabolism, regardless of the presence or absence  
273 of (high) salt in the cultivation media.

274 The Respiratory Quotient (RQ) values calculated over the entire course of the culture, show to be  
275 below or equal to 1 during the exponential growth phase, but never above this value (Fig. 3), this  
276 further supports the absence of fermentation, and therefore confirms that *D. hansenii* is not  
277 producing ethanol from glucose in our conditions, not even in the presence of high salts, as  
278 reported by Calahorra *et al.* (2009). As a final confirmation of the absence of a fermentative  
279 process, our off-gas data and the HPLC analysis show no trace of ethanol neither in the gas phase  
280 nor in the liquid broth samples (Table 1).

281 Although it worths mentioning that this previous work (Calahorra *et al.* 2009) was performed  
282 using a different *D. hansenii* strain in other culture conditions, and their measurements  
283 correspond to ethanol production using enzyme extracts from previously cultured cells, a follow  
284 up study performed by García-Neto *et al.* (2017) contradicted such observation using the same  
285 strain. Our observations align well with the latter study, confirming that no ethanol production is  
286 occurring in our strain either, thus further proving that *D. hansenii* is crabtree negative.

#### 287 **Additional limiting factors affect cell performance in non-controlled cultivation** 288 **environments**

289 In order to test the influence of external pH regulation in the halotolerant / halophilic behavior of  
290 *D. hansenii*, parallel bioreactor cultivations in normal glucose (2%) were run, in which no pH  
291 control was set, and extracellular pH levels were measured on-line in real time. It was observed  
292 that, when no pH control was exerted, the CO<sub>2</sub> profiles of *D. hansenii* evidenced a long  
293 maintained plateau phase which cannot be seen in pH-controlled fermentations, both in control  
294 conditions and under the effect of salts (Fig. 4). The changes in the external pH over time, for the  
295 different conditions tested, are also shown in Supplementary Fig. S4.

296 This led us to determine, that no meaningful conclusion about metabolic patterns or behavior can  
297 be made, with a high degree of accuracy, in non-controlled cultivation environments: whatever  
298 conclusion made is undoubtedly linked to other limiting factors. This means, that previous  
299 studies reporting such conclusions, whose data was obtained from non-controlled environments  
300 (such as shake flasks, for example) must be considered cautiously.

301 If we have a look at the maximum specific growth rates under no pH regulation, it can be  
302 observed an increase in the  $\mu_{\max}$  when 1M NaCl and KCl are used. This points to a potential  
303 summative effect of low pH and high salt concentrations and, once again, sodium seems to have  
304 a higher positive impact on growth when compared to potassium. This had been already  
305 suggested by Almagro *et al* (2000), so our results further confirm this observation. The specific  
306 growth rates decrease once the concentration of both salts is close to 2 M, as also observed in  
307 pH-controlled experiments, although this time there is a lower growth rate compared to the  
308 control conditions, than when pH control is set in the bioreactors (Table S1 at Supp. material).

309 Interestingly, the previously described plateau in the CO<sub>2</sub> profiles is not observed for non-pH  
310 controlled bioreactors run with glucose limiting conditions, where sharper and well defined



311 peaks can be seen in the CO<sub>2</sub> emission profiles (Figure 2A). Here, a faster pH decrease occurs in  
312 optimal growth conditions, corresponding to 1M salt added (either NaCl or KCl) to the media  
313 (Suppl. Fig. S5), compared to the control. This further supports the summative effect of low pH  
314 and increasing salts, to be very beneficial for overall *D. hansenii*'s performance, as already  
315 shown in Figure 2B.

316 About the type of limitation that is occurring, and that generates the long-plateau phase seen in  
317 the CO<sub>2</sub> emission profiles at normal glucose (2%), and why we do not observe such limitation in  
318 limited sugar (0.2%) we cannot elaborate further with the data that we have. This shall need to be  
319 addressed by future, and more specific, experimental studies.

## 320 **Discussion**

321 The results obtained during this study, indicate that high salt concentrations in the culture media  
322 are indeed needed for optimal levels of cell performance in *Debaryomyces hansenii*. Especially  
323 in the case of NaCl, our results seem to finally confirm the halophilic behavior of this particular  
324 yeast: sodium does not exert detrimental effects over *D. hansenii*, but on the contrary. Another  
325 interesting finding is that NaCl exhibit a more significant positive impact than KCl, as the  
326 optimal growth rates are reached in the presence of 1M of NaCl, closely followed by the values  
327 reached at 1M of KCl. This effect is even higher when the glucose source is scarce, as shown in  
328 the limited carbon (0.2%) bioreactor experiments.

329 There is, however, a longer lag phase when the yeast are grown in the presence of 2M NaCl,  
330 both seen in normal (2%) and limited (0.2%) carbon, which may have led to the previous  
331 conclusion by several other studies, performed in non-controlled environments, that the cell  
332 growth is affected by high sodium concentrations (Capusoni *et al.*, 2019). Although these  
333 previous conclusions can of course be due to the fact that those studies have been performed  
334 using different media and another yeast strain different than ours, and in non-controlled  
335 conditions (we actually see in our study that 2M salts in non-controlled conditions can indeed  
336 result in growth deficiency, as observed in Fig. 4B and 4C), our data additionally show that the  
337 decrease in growth rate is not that dramatic at high salts (2M), and moreover, we also observed a  
338 slightly higher biomass yield in normal carbon, a much higher biomass yields in nutrient-limiting  
339 conditions compared to control conditions, as shown in Figure 2B, that the previous studies did  
340 not observe. We propose this as a survival strategy of *D. hansenii* to prevail in drying  
341 environments (e.g. during periods of drought). While other microbial species chose, as surviving  
342 strategy, to enter a dormant state or sporulate while environmental salinity levels are increasing  
343 (as a consequence of the lack of water), *Debaryomyces* reacts by increasing  $\mu_{\max}$  at moderate-  
344 high salinity levels (over 1M is already considered toxic for other yeast and bacterial species, so  
345 they have difficulties to proliferate (Yan *et al.*, 2015)), hence increasing the glucose uptake rate  
346 (as our data reveals) thus ensuring getting the most of the available carbon for its survival in  
347 detriment to its competitors, and later when the salt concentration in the media keeps on  
348 increasing, slowing down the growth rate while still proliferating to overpopulate the area,  
349 changing the metabolic strategy from growing as fast as possible to growing as much as possible.  
350 This suggested strategy would be in accordance with the latest publications indicating that

351 *Debaryomyces* are the most represented species in thawing arctic glacier samples and coastal  
352 environments (Butinar *et al.* 2011; Jaques *et al.* 2014).

353 The dissolved oxygen levels in presence of higher salt concentration are decreasing faster in the  
354 medium, which suggests a higher metabolic activity. RQ values throughout the whole cultivation  
355 period remain below or equal at a value of 1 (reached constantly during the exponential phase),  
356 clearly supporting that there is no fermentative process, as stated previously. Finally, no ethanol  
357 is observed neither in the exometabolite analysis by HPLC, nor in the analysis in the off-gas by  
358 MS, therefore *D. hansenii* is herewith confirmed a crabtree negative yeast.

359 To conclude, our data without pH control in the bioreactor vessels indicate additional limiting  
360 factors during the cultivation, based on the CO<sub>2</sub> production profiles, compared with pH  
361 controlled cultivations, evidenced by a long plateau phase, proving that shake flask experiments  
362 with non-controlled environment are not the ideal setup to obtain accurate conclusions about  
363 physiological and/or metabolic parameters, therefore we also suggest that previous studies  
364 providing conclusions obtained by this means, must be taken cautiously. It is also worth  
365 mentioning that it is not appropriate to choose randomly Na<sup>+</sup> salts or K<sup>+</sup> salts in order to study  
366 osmotolerance or halotolerance in general, as our results show that there is a clear differential  
367 effect exerted by either NaCl or KCl, as already suggested by Martinez *et al.* (2011 and 2012).

368 All in all, our results shed light upon the behaviour of *D. hansenii* in controlled bioreactor  
369 conditions, presenting this peculiar non-conventional yeast as a strain which is able to perform  
370 very well in “standard” cultivation conditions (no stress added) but whose performance gets  
371 significantly improved when environmental conditions get harsh: high salinity / osmotic  
372 pressure, media acidification and nutrient scarcity, all in combination. This undoubtedly confers  
373 to *D. hansenii* an incredibly strong potential for industrial production setups: those are the  
374 conditions that, upon large scale bioproduction processes (meaning vessels of 1000 liter or  
375 above) the microbial cells will encounter throughout the cultivation process, and that are limiting  
376 the suitable performance of microbes in bioreactors (Takors, R. 2012). Therefore, having such a  
377 strain with the abovementioned behavior, and more importantly, obtaining sufficient information  
378 for understanding it (and, consequently, being able to take advantage of that knowledge) is of  
379 paramount interest for advancing in the field of cell factory design for industrial bioprocesses,  
380 and therefore for the biotech industry overall.

381 One of the strongest outcomes of our current study is the possibility of using *D. hansenii* in  
382 culture media containing relatively high salt concentrations, for industrial bioprocesses. On one  
383 hand, there is no need of using pure water sources, which significantly decreases the production  
384 costs as one could take advantage of desalination effluents, or even use directly sea water for the  
385 media composition, while still increasing the production yields (salinity will not affect *D.*  
386 *hansenii*, but will improve its cell performance, as shown by our research). On the other hand,  
387 using saline environments has another strong advantage which is the reduced risk of  
388 contaminations, hence sterilization costs would also be significantly reduced.

389

390 **Conclusion**

391 Altogether, our findings reveal the beneficial role of salts, and more particularly sodium, in the  
392 cell performance of *Debaryomyces*, and open the need to further investigate how sodium and  
393 potassium influence the cell metabolism at a molecular level. It is clear that salts are not just  
394 tolerated in *D. hansenii*, but they play a crucial role in its survival strategy, to date  
395 underestimated. The presence of salts is needed for optimal cell performance. Further research,  
396 including a global expression analysis by RNAseq in steady-state continuous bioreactor  
397 cultivations, will shed light upon what are the intracellular mechanisms that trigger such  
398 metabolic changes, and how the discrimination between sodium and potassium occurs to trigger  
399 the different behavioral patterns described within this study. It will also be interesting from a  
400 biotechnological point of view, the identification of molecular elements that could potentially be  
401 responsive to the presence of salts, as our observations suggest that there are undoubtedly  
402 molecular switches which react to the presence or absence of sodium and/or potassium in the  
403 environment, triggering a specific metabolic response.

404

#### 405 **Acknowledgements**

406 We acknowledge the Novo Nordisk Fonden, within the framework of the Fermentation Based  
407 Biomanufacturing Initiative, for supporting this work. LRM received the fellowship “Ayuda de  
408 Movilidad Internacional para el Fomento de Tesis con Mención Internacional” from the  
409 University of Córdoba (Spain), to carry out her research work at DTU Bioengineering for three  
410 months. Prof. José Ramos (University of Córdoba, Spain) and Dr. Markus Bisschops (TU Delft,  
411 The Netherlands) are deeply acknowledged for critical reading of this manuscript. The authors  
412 would also like to thank the Fermentation Core at DTU Bioengineering, and Tina Johansen as  
413 well as Martin Nielsen for their technical support.

414

#### 415 **Author’s contributions**

416 JLM conceived the project. CN, ATF and LRM designed and performed the experiments. CN  
417 and ATF analyzed the data. CN and JLM wrote the manuscript. All authors read, commented and  
418 approved the manuscript.

419

#### 420 **Competing interests**

421 The authors declare that they have no competing interests.

422

#### 423 **References**

424 Adler L, Blomberg A, Nilsson A. Glycerol metabolism and osmoregulation in the salt-tolerant  
425 yeast *Debaryomyces hansenii*. *J Bacteriol* 1985;**162**: 300-06.

- 426 Almagro A, Prista C, Castro S *et al.* Effects of salt on *Debaryomyces hansenii* and  
427 *Saccharomyces cerevisiae* under stress conditions. *Int J Food Microbiol* 2000;**56**: 191-97.
- 428 Almagro A, Prista C, Benito B *et al.* Cloning and expression of two genes coding for sodium  
429 pumps in the salt-tolerant yeast *Debaryomyces hansenii*. *J Bacteriol* 2001;**183**: 3251-55.
- 430 Banjara N, Nickerson KW, Suhr MJ *et al.* Killer toxin from several food-derived *Debaryomyces*  
431 *hansenii* strains effective against pathogenic *Candida* yeasts. *Int J Food Microbiol* 2016;**222**: 23-  
432 29.
- 433 Biswas D, Datt M, Aggarwal M *et al.* Molecular cloning, characterization, and engineering of  
434 xylitol dehydrogenase from *Debaryomyces hansenii*. *Appl Microbiol Biotechnol* 2013;**97**: 1613-  
435 23.
- 436 Breuer U, Harms H. *Debaryomyces hansenii* – an extremophilic yeast with biotechnological  
437 potential. *Yeast* 2006;**23**: 415-37.
- 438 Brooks AA. Ethanol production potential of local yeast strains isolated from ripe banana peels.  
439 *Afr J Biotechnol* 2008;**7**: 3749-52.
- 440 Butinar L, Strmole T, Gunde-Cimerman N. Relative incidence of *Ascomycetous* yeasts in Arctic  
441 coastal environments. *Microb Ecol* 2011;**61**: 832-43.
- 442 Butinar L, Zalar P, Frisvad JC *et al.* The genus *Eurotium*: members of indigenous fungal  
443 community in hypersaline waters of salterns. *FEMS Microbiol Ecol* 2005;**51**: 155-66.
- 444 Calahorra M, Sánchez NS, Peña A. Activation of fermentation by salts in *Debaryomyces*  
445 *hansenii*. *FEMS Yeast Res* 2009;**9**: 1293-301.
- 446 Cano-Garcia L, Belloch C, Flores M. Impact of *Debaryomyces hansenii* strains inoculation on  
447 the quality of slow dry-cured fermented sausages. *Meat Sci* 2014;**96**: 1469-77.
- 448 Capusoni C, Arioli S, Donzella S *et al.* Hyper-osmotic stress elicits membrane depolarization  
449 and decreased permeability in halotolerant marine *Debaryomyces hansenii* strains and in  
450 *Saccharomyces cerevisiae*. *Front Microbiol* 2019;**10**: 64.
- 451 Casal M, Paiva S, Queiros O *et al.* Transport of carboxylic acids in yeasts. *FEMS Microbiol Rev*  
452 2008;**32**: 974-94.
- 453 Chao HF, Yen YF, Ku MS. Characterization of a salt-induced DhAHP, a gene coding for an  
454 alkyl hydroperoxide reductase, from the extremely halophilic yeast *Debaryomyces hansenii*.  
455 *BMC Microbiol* 2009;**9**:182.
- 456 Dujon B, Sherman D, Fischer G *et al.* Genome evolution in yeasts. *Nature* 2004;**430**: 35-44.
- 457 Ferreira D, Nobre A, Silva ML *et al.* XYLH encodes a xylose/H<sup>+</sup> symporter from the highly  
458 related yeast species *Debaryomyces fabryi* and *Debaryomyces hansenii*. *FEMS Yeast Res*  
459 2013;**13**: 585-96.

- 460 Gadanho M, Almeida JM, Sampaio JP. Assessment of yeast diversity in a marine environment in  
461 the south of Portugal by microsatellite-primed PCR. *Antonie Van Leeuwenhoek* 2003;**84**: 217-27.
- 462 García-Neto W, Cabrera-Orefice A, Uribe-Carvajal S *et al.* High osmolarity environments  
463 activate the mitochondrial alternative oxidase in *Debaryomyces hansenii*. *PLOS One* 2017;  
464 12(1):e0169621.
- 465 Garcia-Salcedo R, Montiel V, Calero F *et al.* Characterization of *DhKHA1*, a gene coding for a  
466 putative Na(+) transporter from *Debaryomyces hansenii*. *FEMS Yeast Res* 2007;**7**: 905-11.
- 467 Gonzalez-Hernandez JC, Cardenas-Monroy CA, Peña A. Sodium and Potassium transport in the  
468 halophilic yeast *Debaryomyces hansenii*. *Yeast* 2004;**21**:403-412.
- 469 Görgens JF, Van Zyl WH, Knoetze JH. Reliability of methods for the determination of specific  
470 substrate consumption rates in batch culture. *Biochem Eng J* 2005;**25**: 109-12.
- 471 Gunde-Cimerman N, Ramos J, Plemenitas A. Halotolerant and halophilic fungi. *Mycol Res*  
472 2009;**113**: 1231-41.
- 473 Gustafsson L, Norkrans B. On the mechanism of salt tolerance: production of glycerol and heat  
474 during growth of *Debaryomyces hansenii*. *Arch Microbiol* 1976;**110**: 177-83.
- 475 Jacques N, Zenouche A, Gunde-Cimerman N *et al.* Increased diversity in the genus  
476 *Debaryomyces* from Arctic glaciers samples. *Antonie Van Leeuwenhoek* 2015;**107**: 487-501.
- 477 Lopez Del Castillo-Lozano M, Delile A, Spinnler HE *et al.* Comparison of volatile sulphur  
478 compound production by cheese-ripening yeasts from methionine and methionine–cysteine  
479 mixtures. *Appl Microbiol Biotechnol* 2007;**75**: 1447-54.
- 480 Martinez JL, Sychrova H, Ramos J. Monovalent cations regulate expression and activity of the  
481 Hak1 potassium transporter in *Debaryomyces hansenii*. *Fungal Genet Biol* 2011;**48**: 177-84.
- 482 Martinez JL, Luna C, Ramos J. Proteomic changes in response to potassium starvation in the  
483 extremophilic yeast *Debaryomyces hansenii*. *FEMS Yeast Res* 2012;**12**: 651-61.
- 484 Montiel V, Ramos J. Intracellular Na and K distribution in *Debaryomyces hansenii*: cloning and  
485 expression in *Saccharomyces cerevisiae* of *DhNHX1*. *FEMS Yeast Res* 2007;**7**: 102-09.
- 486 Navarrete C, Siles A, Martínez JL *et al.* Oxidative stress sensitivity in *Debaryomyces hansenii*.  
487 *FEMS Yeast Res* 2009;**9**: 582-90.
- 488 Norkrans B. Studies on marine occurring yeasts: growth related to pH, NaCl concentration and  
489 temperature. *Arch Mikrobiol* 1966;**54**: 374-92.
- 490 Papouskova K, Sychrova H. The co-action of osmotic and high temperature stresses results in a  
491 growth improvement of *Debaryomyces hansenii* cells. *Int J Food Microbiol* 2007;**118**: 1-7.
- 492 Pina C, Couto JA, Hogg T. Inferring ethanol tolerance of *Saccharomyces* and non-  
493 *Saccharomyces* yeasts by progressive inactivation. *Biotechnol Lett* 2004;**26**: 1521-27.



- 494 Prista C, Almagro A, Loureiro-Dias MC *et al.* Physiological basis for the high salt tolerance of  
495 *Debaryomyces hansenii*. *Appl Environ Microbiol* 1997;**63**: 4005-09.
- 496 Prista C, Loureiro-Dias MC, Montiel V *et al.* Mechanisms underlying the halotolerant way of  
497 *Debaryomyces hansenii*. *FEMS Yeast Res* 2005;**5**: 693-701.
- 498 Prista C, Gonzalez-Hernandez JC, Ramos J *et al.* Cloning and characterization of two K<sup>+</sup>  
499 transporters of *Debaryomyces hansenii*. *Microbiology* 2007;**153**: 3034-43.
- 500 Prista C, Michán C, Miranda IM *et al.* The halotolerant *Debaryomyces hansenii*, the Cinderella  
501 of non-conventional yeasts. *Yeast*. 2016;**33**: 523-33.
- 502 Ramos J, Melero Y, Ramos-Moreno L *et al.* *Debaryomyces hansenii* strains from Valle de Los  
503 Pedroches iberian dry meat products: isolation, identification, characterization, and selection for  
504 starter cultures. *J Microbiol Biotechnol* 2017;**27**:1576-85.
- 505 Roels JA. Energetics and kinetics in biotechnology. Amsterdam; New York: Elsevier Biomedical  
506 Press, 1983, 1-330.
- 507 Sánchez NS, Calahorra M, Ramírez J *et al.* Salinity and high pH affect energy pathways and  
508 growth in *Debaryomyces hansenii*. *Fungal Biol* 2018;**122**: 977-90.
- 509 Takors R. Scale-up of microbial processes: impacts, tools and open questions. *J Biotechnol*  
510 2012;**160**:3-9.
- 511 Tavares JM, Duarte LC, Amaral-Collaco MT *et al.* The influence of hexoses addition on the  
512 fermentation of D-xylose in *Debaryomyces hansenii* under continuous cultivation. *Enzyme*  
513 *Microb Technol* 2000;**26**: 743-47.
- 514 Velkova K, Sychrova H. The *Debaryomyces hansenii* *NHA1* gene encodes a plasma membrane  
515 alkali-metal-cation antiporter with broad substrate specificity. *Gene* 2006;**369**: 27-34.
- 516 Yan N, Marschner P, Cao W *et al.* Influence of salinity and water content on soil  
517 microorganisms. *Int Soil and Water Conservation Research* 2015;**3**:316-323.
- 518
- 519
- 520
- 521
- 522
- 523
- 524
- 525
- 526

527 **Table 1.** Yield coefficients and specific glucose consumption rates from batch cultivations.

| Conditions | $Y_{SC}^1$ | $Y_{SX}^1$ | $Y_{SE}^1$      | $Y_{SG}^1$ | C-balance <sup>2</sup> | SGCR ( $r_s$ ) <sup>3</sup> |
|------------|------------|------------|-----------------|------------|------------------------|-----------------------------|
| Control    | 0.63±0.01  | 0.35±0.00  | ns <sup>4</sup> | ns         | 0.98±0.01              | 0.120±0.004                 |
| 1M NaCl    | 0.63±0.07  | 0.35±0.04  | ns              | ns         | 0.98±0.11              | 0.163±0.012                 |
| 1.25M NaCl | 0.60±0.02  | 0.34±0.01  | ns              | ns         | 0.94±0.04              | 0.159±0.002                 |
| 1.5M NaCl  | 0.63±0.10  | 0.35±0.06  | ns              | ns         | 0.98±0.16              | 0.133±0.014                 |
| 2M NaCl    | 0.63       | 0.36       | ns              | ns         | 0.99                   | 0.098±0.014                 |
| 1M KCl     | 0.68±0.05  | 0.38±0.03  | ns              | ns         | 1.05±0.08              | 0.159±0.012                 |
| 1.25M KCl  | 0.63±0.05  | 0.35±0.03  | ns              | ns         | 0.98±0.08              | 0.148±0.004                 |
| 1.5M KCl   | 0.68±0.04  | 0.38±0.02  | ns              | ns         | 1.06±0.06              | 0.144                       |
| 2M KCl     | 0.66±0.14  | 0.37±0.08  | ns              | ns         | 1.02±0.21              | 0.138±0.001                 |

528 Yield coefficients from batch cultivations of *Debaryomyces hansenii* at different salt concentrations  
 529 are shown in the table. Additionally, the specific glucose consumption rates during the exponential  
 530 phase calculated based on the logarithmic method are presented. The cells were grown in  
 531 synthetic complete medium with or without salt at different concentrations, at 28°C and pH 6.  
 532 Data shown are mean values ± 95% confidence interval of a number of replicates.

533 <sup>1</sup>Yield of CO<sub>2</sub> (C), Biomass (X), Ethanol (E), and Glycerol (G) from Glucose (S) in cmol/cmol.

534 <sup>2</sup>Carbon balance on a C-mol basis, where a value of 1 indicate a closed carbon balance.

535 <sup>3</sup>Specific Glucose consumption rate in cmol/cmol/h based on logarithmic method.

536 <sup>4</sup>ns: Not significant. The amount of ethanol and glycerol was neglectable.

537

538

539

540

541

542

543

544

545

546

547

548

549

550

551

552

553 **Figure legends**

554

555 **Figure 1.** Maximum specific growth rates and carbon dioxide evolution rate (CER) profiles from  
556 batch cultivations with sodium (A) or potassium (B) chloride. Maximum specific growth rates  
557 determined by optical density (OD) and off-gas CO<sub>2</sub> emission data from batch cultivations of  
558 *Debaryomyces hansenii* in synthetic complete media at 28°C and pH 6 with varying  
559 concentrations of sodium/potassium chloride are shown in the tables. The CER profiles are based  
560 on off-gas CO<sub>2</sub> emission data over time from one replicate for each condition and are  
561 representative of their associated replicate(s).

562 **Figure 2.** Carbon dioxide evolution rate (CER) profiles and yield coefficients, specific glucose  
563 consumption and maximum specific growth rates from batch cultivations under limiting glucose  
564 conditions and without pH regulation. Off-gas CO<sub>2</sub> emission data from batch cultivations of  
565 *Debaryomyces hansenii* in synthetic complete media containing 0.2% of glucose at 28°C and  
566 initial pH value of 6 with varying concentrations of sodium/potassium chloride are shown in the  
567 figure (A). The CER profiles are based on off-gas CO<sub>2</sub> emission data over time from one  
568 replicate for each condition and are representative of their associated duplicate. Yield  
569 coefficients and maximum specific growth rates from batch cultivations of *Debaryomyces*  
570 *hansenii* at different salt concentrations are shown in the table. Additionally, the specific glucose  
571 consumption rates during the exponential phase calculated based on the logarithmic method are  
572 presented (B). The cells were grown in synthetic complete medium containing 0.2% of glucose  
573 and with or without salt at different concentrations, at 28°C and initial pH of 6. Data shown are  
574 mean values ± 95% confidence interval of duplicates.

575 **Figure 3.** Dissolved oxygen (DO) and respiratory quotient (RQ) profiles from batch cultivations  
576 with sodium (A) or potassium (B) chloride. Dissolved oxygen (%) levels measured over time (h)  
577 in synthetic complete media at 28°C and pH 6 with varying concentrations of sodium/potassium  
578 chloride, are represented in the figure. The DO profiles are based on one replicate for each  
579 condition and are representative of their associated replicate(s). The RQ profiles are based on  
580 OUR and CER values calculated from off-gas O<sub>2</sub> consumption and off-gas CO<sub>2</sub> emission data  
581 from one replicate for each condition and are representative of their associated replicate(s).

582 **Figure 4.** Graphical comparison of CER profiles with and without pH regulation for batch  
583 cultivations with varying concentrations of salts. The CER profiles are based on off-gas CO<sub>2</sub>  
584 emission data over time from one replicate for each condition and are representative of their  
585 associated replicate(s). The cells were grown in synthetic complete media at 28°C with and  
586 without pH regulation (pH 6 with regulation). The cells were either grown without salts (A),  
587 NaCl (B) or KCl (C).

Figure 1

A)

Maximum specific growth rates ( $\mu_{max}$ ).

| Conditions | $\mu_{max}$ - OD <sup>1</sup> | $\mu_{max}$ - CO <sub>2</sub> <sup>1</sup> |
|------------|-------------------------------|--------------------------------------------|
| Control    | 0.103±0.006                   | 0.105±0.004                                |
| 1M NaCl    | 0.170±0.005                   | 0.176±0.000                                |
| 1.25M NaCl | 0.168±0.006                   | 0.165±0.005                                |
| 1.5M NaCl  | 0.150±0.008                   | 0.143±0.017                                |
| 2M NaCl    | 0.106±0.005                   | 0.101±0.000                                |

Note: Data shown are mean values ± 95% confidence interval of a number of replicates.

<sup>1</sup> The maximum specific growth rates (h<sup>-1</sup>) on glucose determined by OD<sub>600</sub> and off-gas CO<sub>2</sub>.

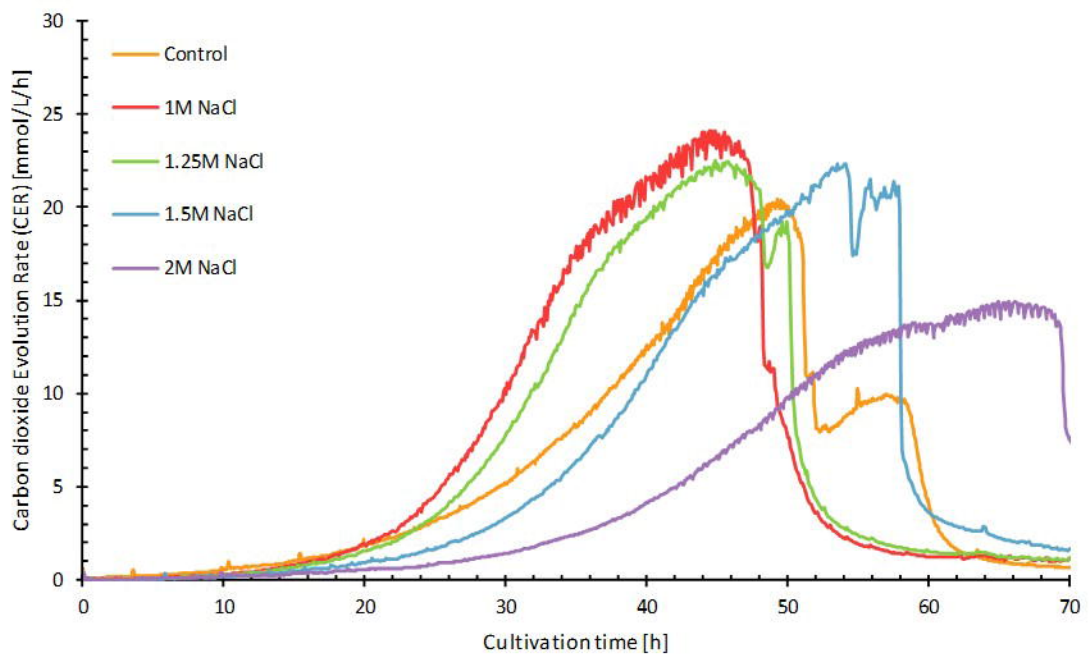

B)

Maximum specific growth rates ( $\mu_{max}$ ).

| Conditions | $\mu_{max}$ - OD <sup>1</sup> | $\mu_{max}$ - CO <sub>2</sub> <sup>1</sup> |
|------------|-------------------------------|--------------------------------------------|
| Control    | 0.103±0.006                   | 0.105±0.004                                |
| 1M KCl     | 0.153±0.014                   | 0.165±0.001                                |
| 1.25M KCl  | 0.131±0.002                   | 0.162±0.004                                |
| 1.5M KCl   | 0.119±0.037                   | 0.119±0.050                                |
| 2M KCl     | 0.086±0.009                   | 0.092±0.003                                |

Note: Data shown are mean values ± 95% confidence interval of a number of replicates.

<sup>1</sup> The maximum specific growth rates (h<sup>-1</sup>) on glucose determined by OD<sub>600</sub> and off-gas CO<sub>2</sub>.

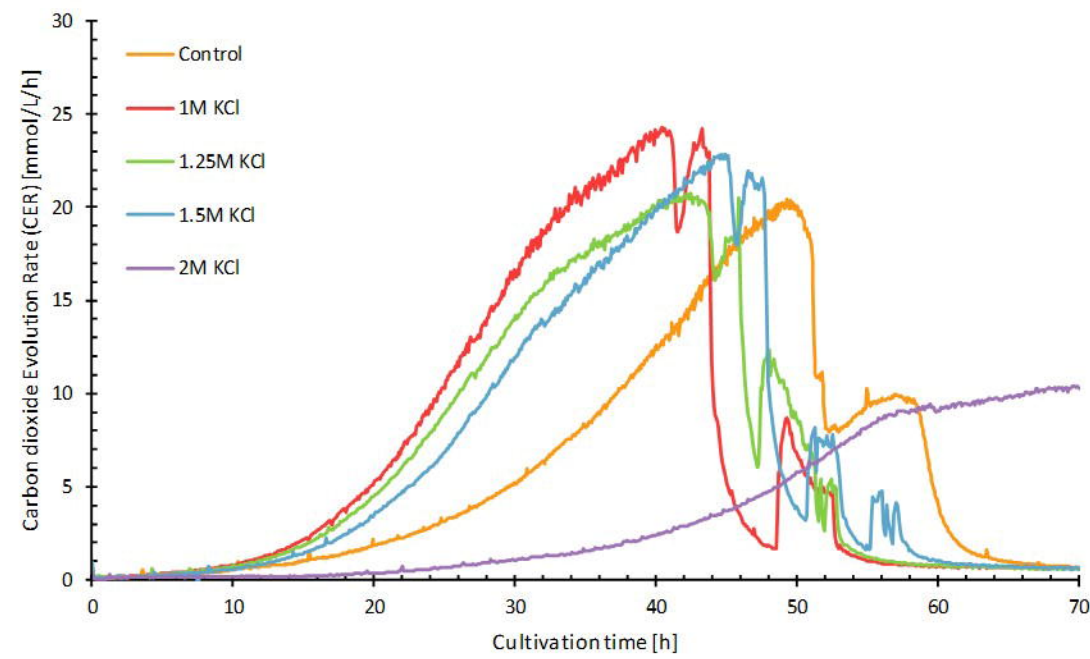

**Figure 2****A)**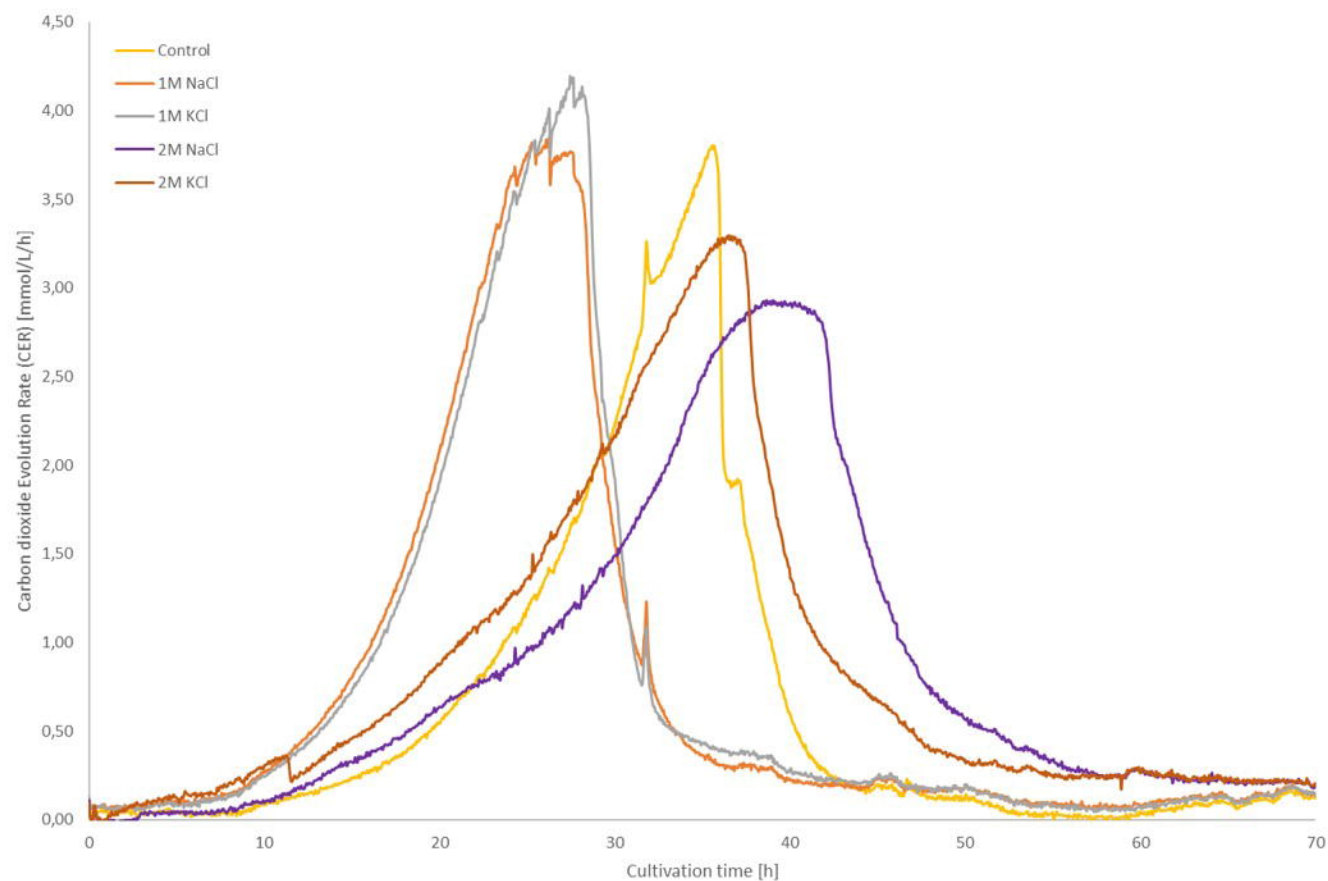**B)**

Yield coefficients, specific glucose consumption and maximum specific growth rates from batch cultivations in glucose limiting conditions and without pH regulation.

| Conditions | $Y_{sc}^1$      | $Y_{sx}^1$      | SGCR ( $r_s$ ) <sup>2</sup> | $\mu_{max}^3$     |
|------------|-----------------|-----------------|-----------------------------|-------------------|
| Control    | $0.37 \pm 0.06$ | $0.21 \pm 0.03$ | $0.16 \pm 0.02$             | $0.177 \pm 0.024$ |
| 1M NaCl    | $0.53 \pm 0.03$ | $0.30 \pm 0.02$ | $0.38 \pm 0.13$             | $0.214 \pm 0.008$ |
| 1M KCl     | $0.51 \pm 0.07$ | $0.29 \pm 0.04$ | $0.46 \pm 0.03$             | $0.214 \pm 0.005$ |
| 2M NaCl    | $0.61 \pm 0.03$ | $0.34 \pm 0.02$ | $0.13 \pm 0.01$             | $0.200 \pm 0.009$ |
| 2M KCl     | $0.65 \pm 0.05$ | $0.36 \pm 0.03$ | $0.14 \pm 0.00$             | $0.167 \pm 0.028$ |

<sup>1</sup> Yield of CO<sub>2</sub> (C) and Biomass (X) from Glucose (S) in cmol/cmol.

<sup>2</sup> Specific Glucose consumption rate in cmol/cmol/h based on logarithmic method.

<sup>3</sup> The maximum specific growth rates (h<sup>-1</sup>) on glucose determined by off-gas CO<sub>2</sub>.



Figure 3

A)

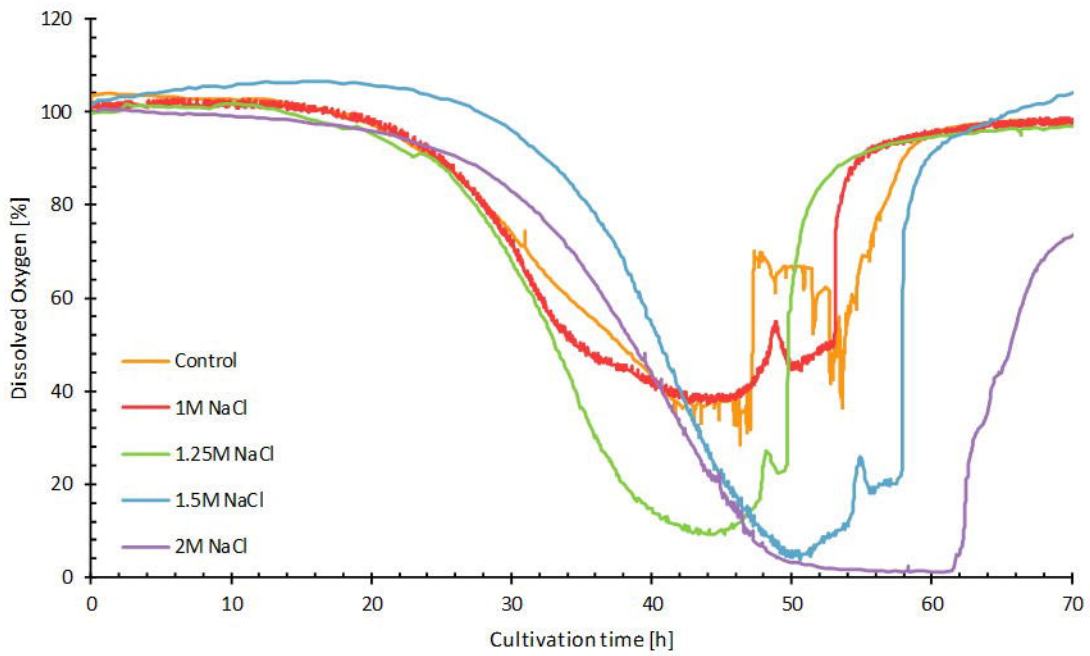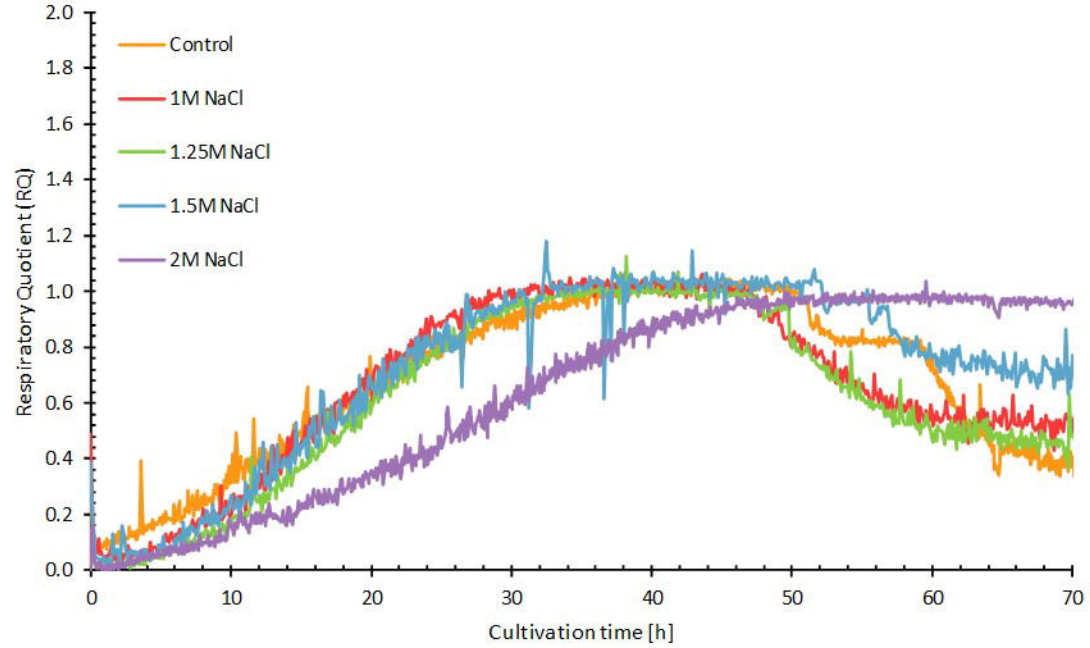

B)

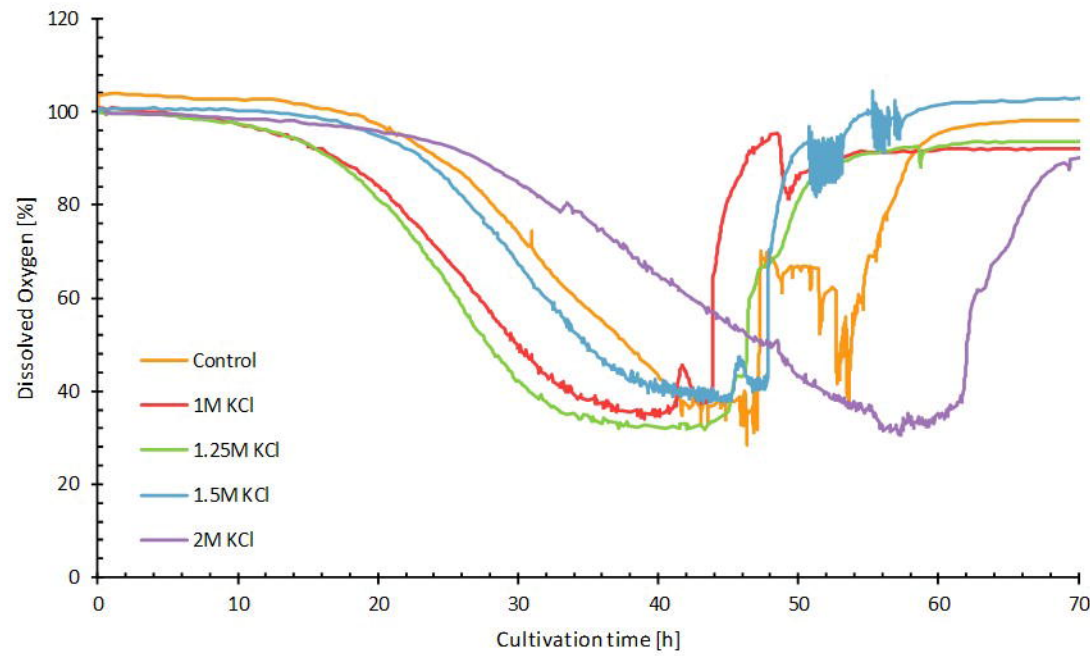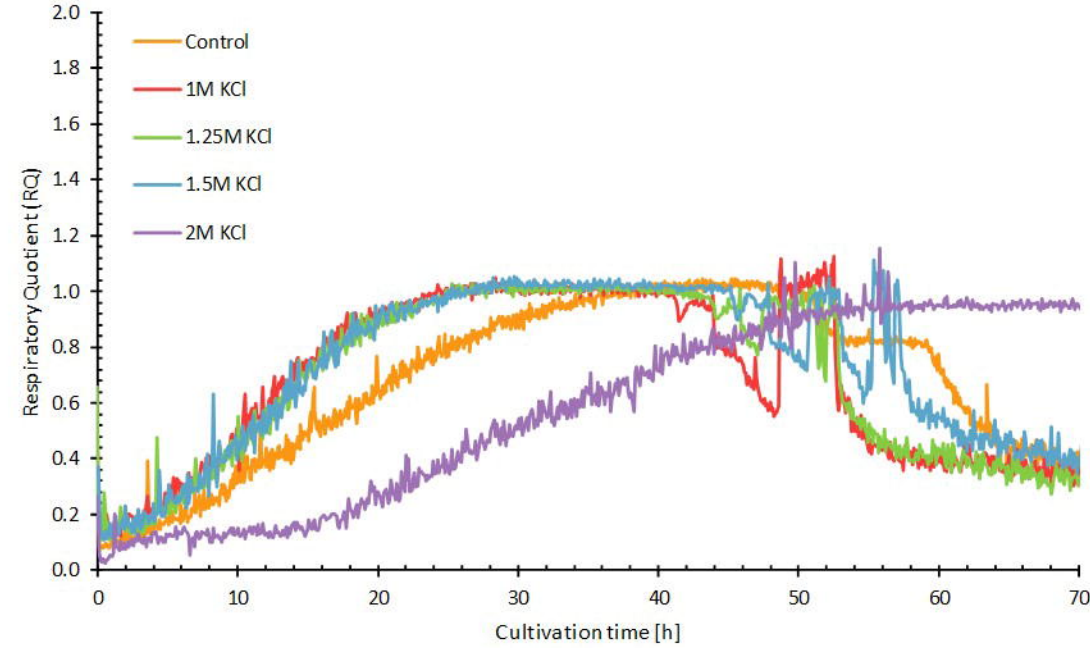

Figure 4

A)

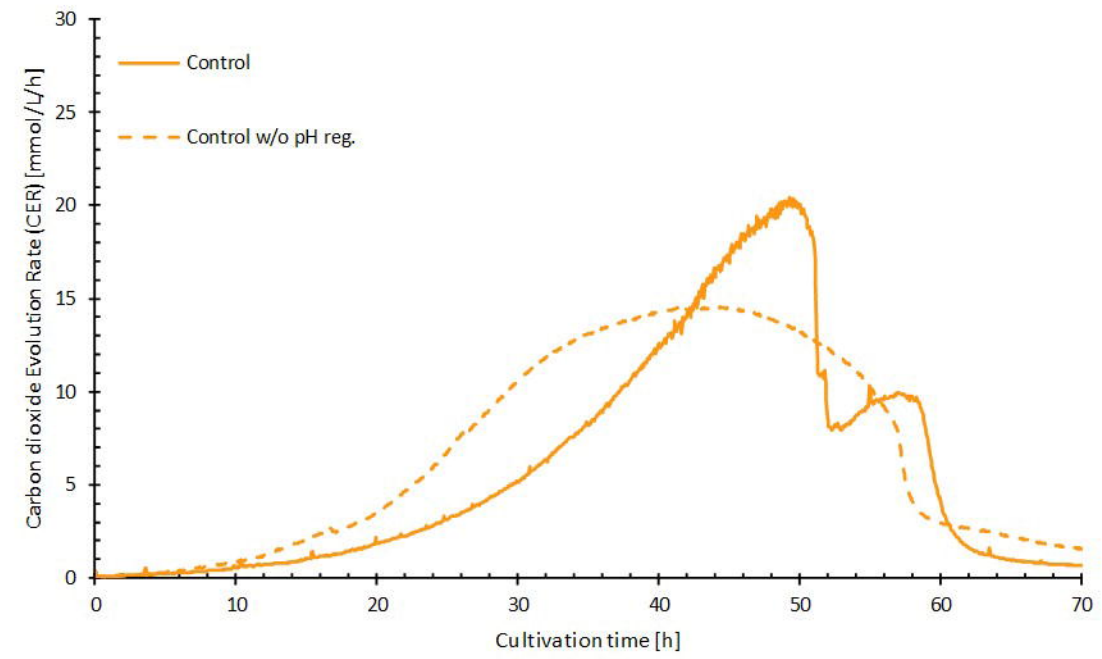

B)

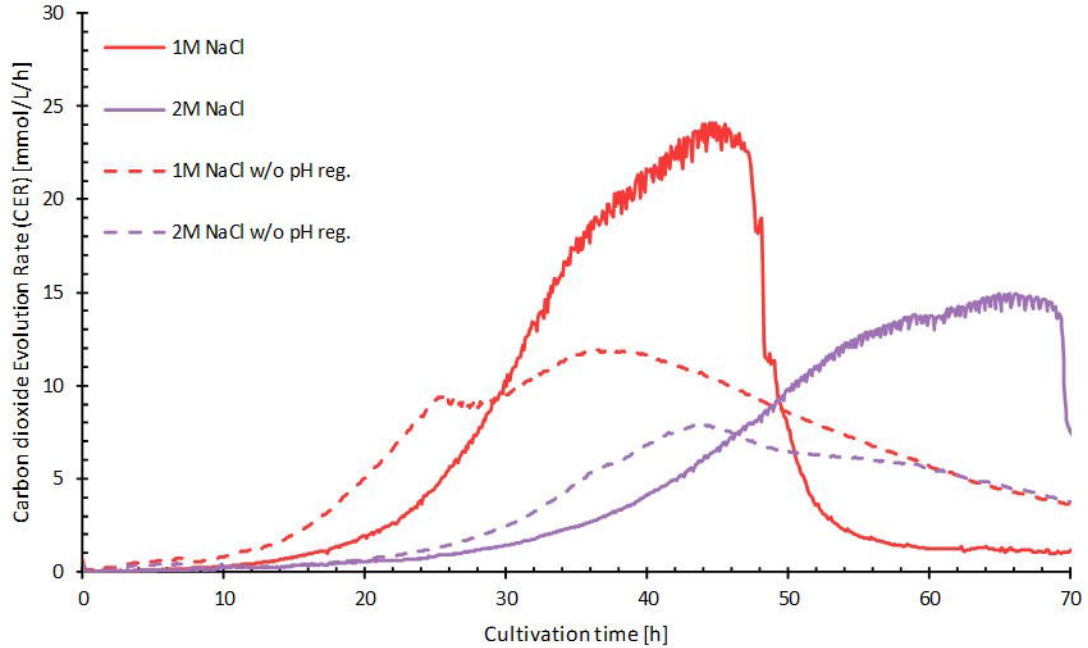

C)

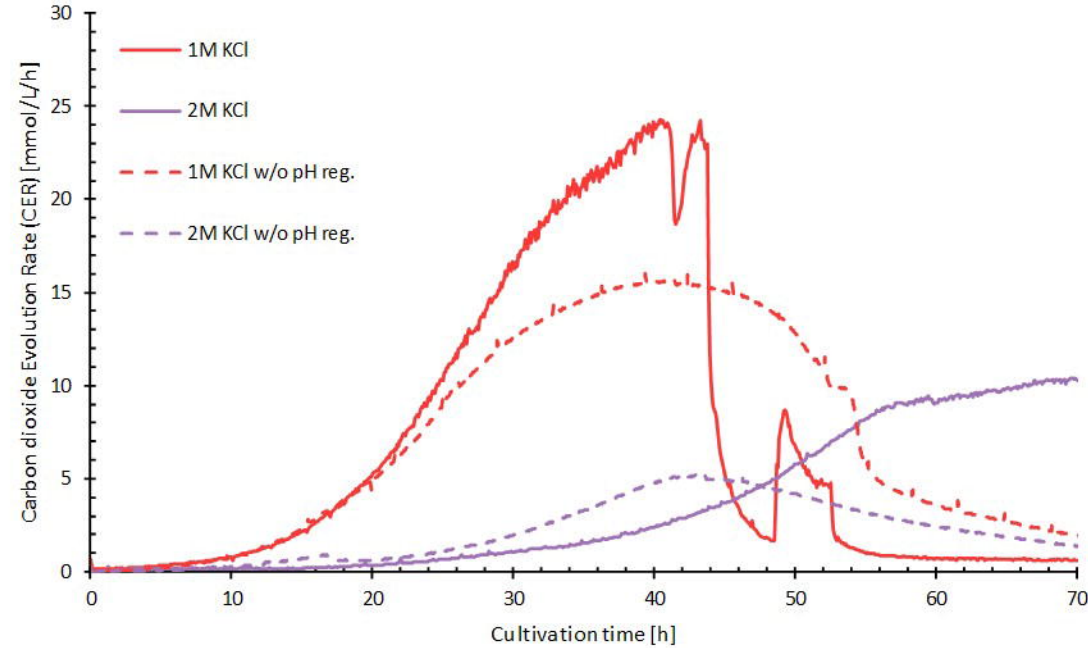

Source: https://www.biorxiv.org/content/biorxiv/early/2020/01/11/2020.01.10.901843.full.pdf
